# Supplementary material for: Wire-on-flake heterostructured ternary Co0.5Ni0.5P/CC: an efficient hydrogen evolution electrocatalyst
Source: Royal Society of Chemistry journal article supplement (doi:10.1039/c6ta08094d), 2016-11-22
Supplement: c6ta08094d1.pdf [file c6ta08094d1.pdf]

# Wire-on-flake Heterostructured Ternary $\text{Co}_{0.5}\text{Ni}_{0.5}\text{P}/\text{CC}$ : An Efficient Hydrogen Evolution Electrocatalyst

*Xiaoyan Zhang<sup>ab</sup>, Wenling Gu<sup>ab</sup> and Erkang Wang<sup>ab\*</sup>*

<sup>a</sup>State Key Laboratory of Electroanalytical Chemistry, Changchun Institute of Applied Chemistry,

Chinese Academy of Sciences, Changchun, Jilin 130022, China

<sup>b</sup>University of Chinese Academy of Sciences, Beijing, 100049, China

\*Corresponding author, Email: [ekwang@ciac.ac.cn](mailto:ekwang@ciac.ac.cn), Tel: +86-431-85262003

**KEYWORDS:** Wire-on-flake Heterostructure, Ternary  $\text{Co}_{0.5}\text{Ni}_{0.5}\text{P}/\text{CC}$ , Self-supported electrode,

Hydrogen evolution

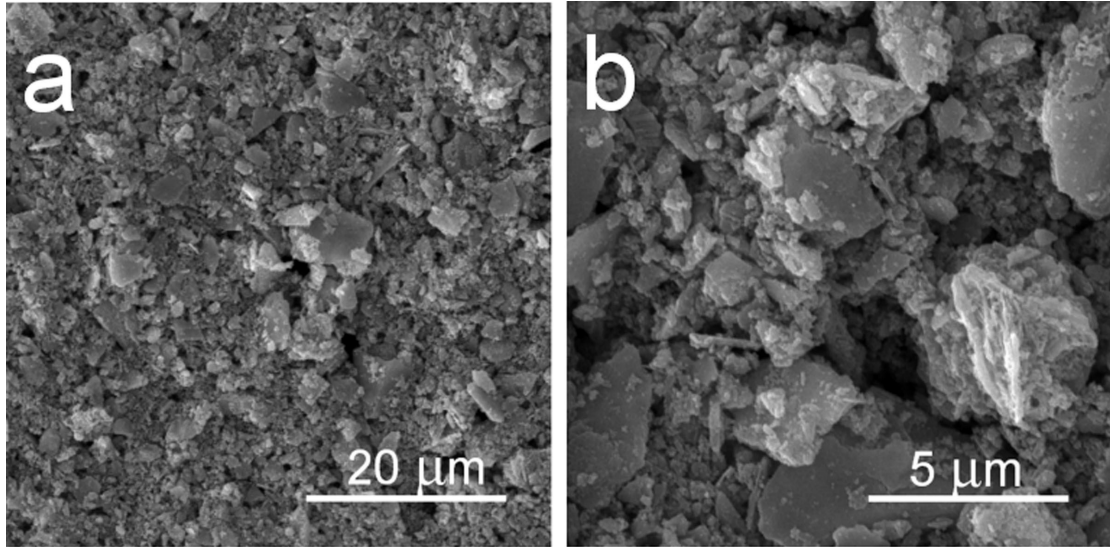

**Figure S1.** SEM images of  $\text{Co}_{0.5}\text{Ni}_{0.5}\text{P}$  scratched from CC with different magnifications.

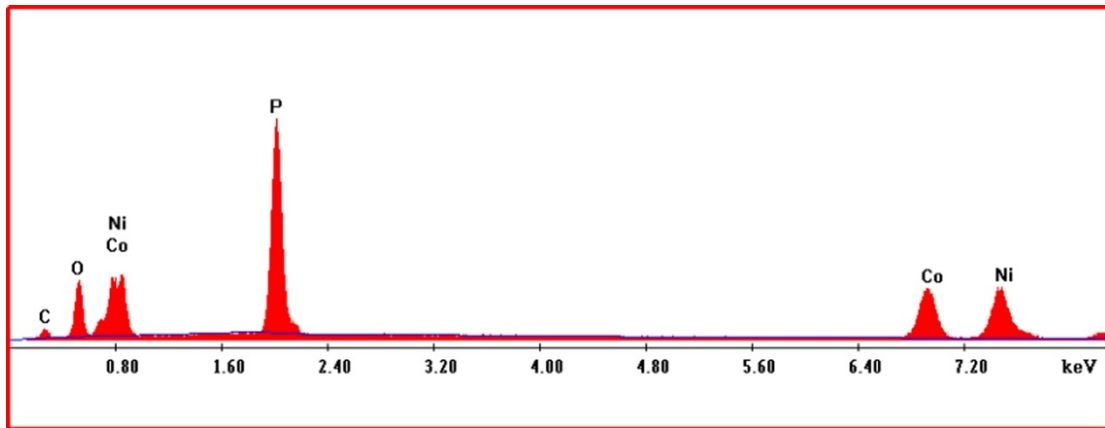

**Figure S2.** EDX spectrum for Co<sub>0.5</sub>Ni<sub>0.5</sub>P/CC.

**Table S1.** Elements percentage of  $\text{Co}_{0.5}\text{Ni}_{0.5}\text{P}/\text{CC}$  obtained from EDX and ICP-MS.

| <b>Elements</b> | <b>Weight% (EDX)</b> | <b>Atomic% (EDX)</b> | <b>Atomic% (ICP-MS)</b> |
|-----------------|----------------------|----------------------|-------------------------|
| Co              | 33.13                | 25.48                | 25.91                   |
| Ni              | 33.73                | 26.04                | 25.35                   |
| P               | 33.14                | 48.48                | 48.74                   |
| Total           | 100                  | 100                  | 100                     |
| Co:Ni:P         |                      | 1:1.02:1.90          | 1.02:1:1.92             |

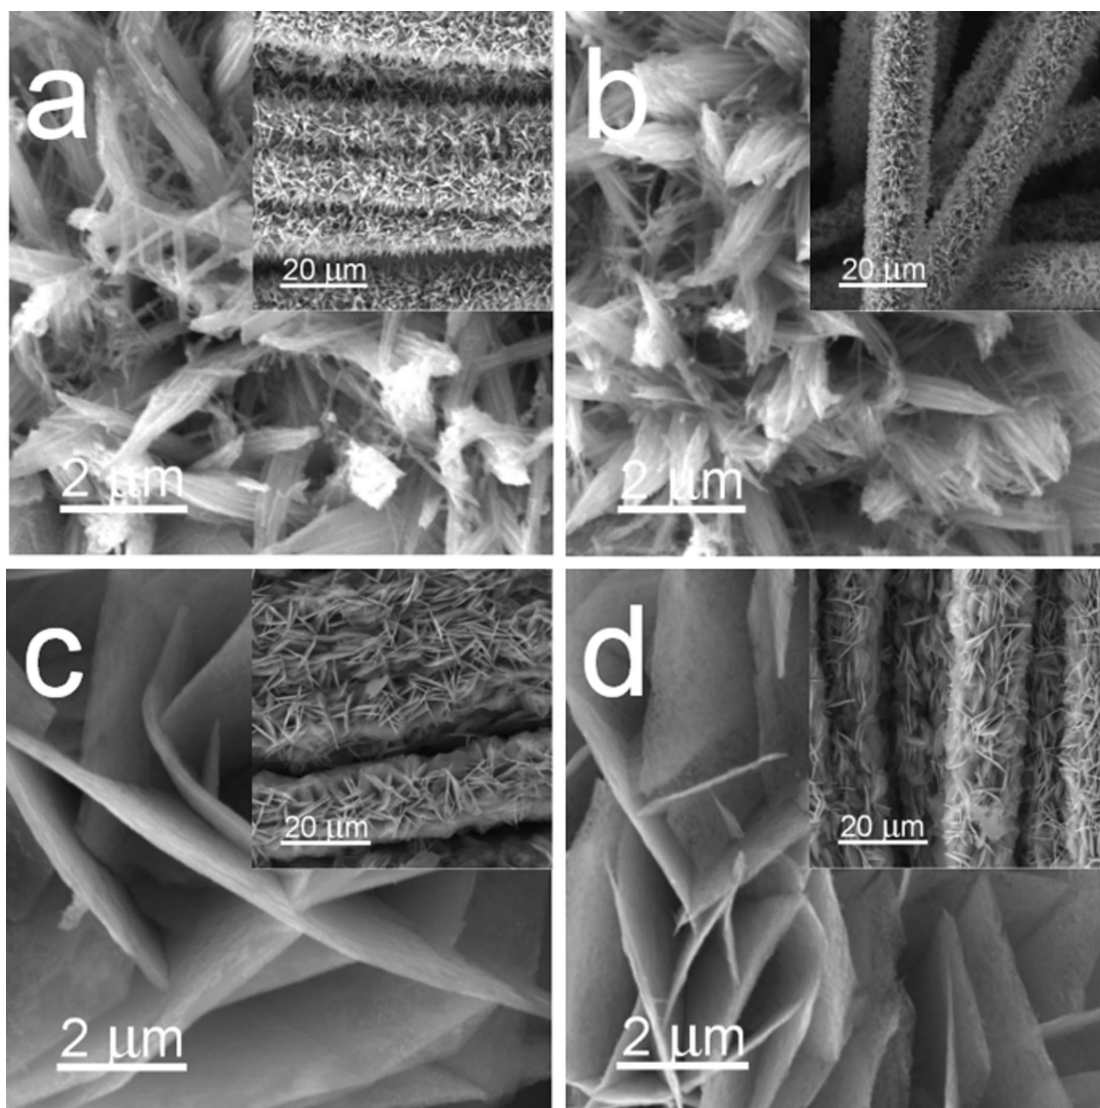

**Figure S3.** SEM images for (a)  $\text{Co}_{0.75}\text{Ni}_{0.25}\text{P}/\text{CC}$ , (b)  $\text{Co}_{0.66}\text{Ni}_{0.33}\text{P}/\text{CC}$ , (c)  $\text{Co}_{0.33}\text{Ni}_{0.66}\text{P}/\text{CC}$  and (d)  $\text{Co}_{0.25}\text{Ni}_{0.75}\text{P}/\text{CC}$ . Inset in (a-d): SEM images of  $\text{Co}_{0.75}\text{Ni}_{0.25}\text{P}/\text{CC}$ ,  $\text{Co}_{0.66}\text{Ni}_{0.33}\text{P}/\text{CC}$ ,  $\text{Co}_{0.33}\text{Ni}_{0.66}\text{P}/\text{CC}$  and  $\text{Co}_{0.25}\text{Ni}_{0.75}\text{P}/\text{CC}$  with a larger magnification, respectively.

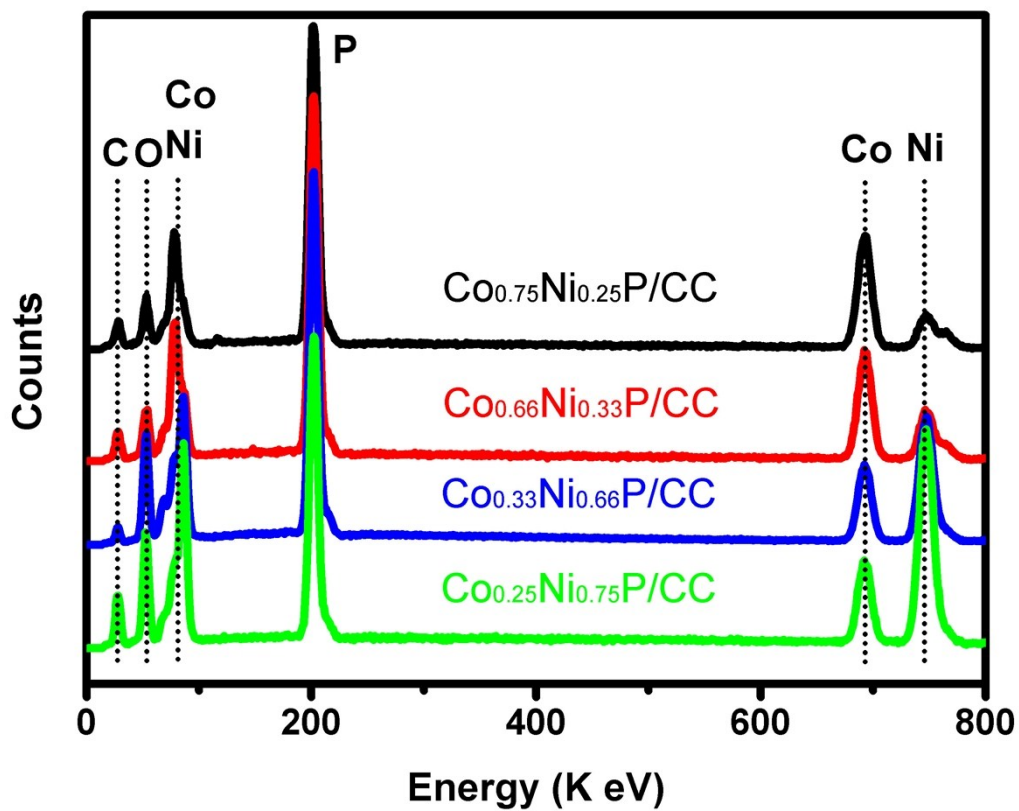

**Figure S4.** EDX spectra for  $\text{Co}_{0.75}\text{Ni}_{0.25}\text{P/CC}$ ,  $\text{Co}_{0.66}\text{Ni}_{0.33}\text{P/CC}$ ,  $\text{Co}_{0.33}\text{Ni}_{0.66}\text{P/CC}$  and  $\text{Co}_{0.25}\text{Ni}_{0.75}\text{P/CC}$ , respectively.

**Table S2.** Elements percentage of  $\text{Co}_{0.75}\text{Ni}_{0.25}\text{P/CC}$ ,  $\text{Co}_{0.66}\text{Ni}_{0.33}\text{P/CC}$ ,  $\text{Co}_{0.33}\text{Ni}_{0.66}\text{P/CC}$  and  $\text{Co}_{0.25}\text{Ni}_{0.75}\text{P/CC}$  obtained from EDX.

| Elements | Atomic% (EDX)                                     |                                                   |                                                   |                                                   |
|----------|---------------------------------------------------|---------------------------------------------------|---------------------------------------------------|---------------------------------------------------|
|          | $\text{Co}_{0.75}\text{Ni}_{0.25}\text{P/C}$<br>C | $\text{Co}_{0.66}\text{Ni}_{0.33}\text{P/C}$<br>C | $\text{Co}_{0.33}\text{Ni}_{0.66}\text{P/C}$<br>C | $\text{Co}_{0.25}\text{Ni}_{0.75}\text{P/C}$<br>C |
| Co       | 50.33                                             | 50.7                                              | 6.27                                              | 3.48                                              |
| Ni       | 36.86                                             | 32.57                                             | 21.14                                             | 14.71                                             |
| P        | 12.81                                             | 16.73                                             | 72.59                                             | 81.81                                             |
| Total    | 100                                               | 100                                               | 100                                               | 100                                               |
| Co:Ni:P  | 2.88:1:4                                          | 1.95:1:3                                          | 3.4:11.6:1                                        | 4.23:23.5:1                                       |

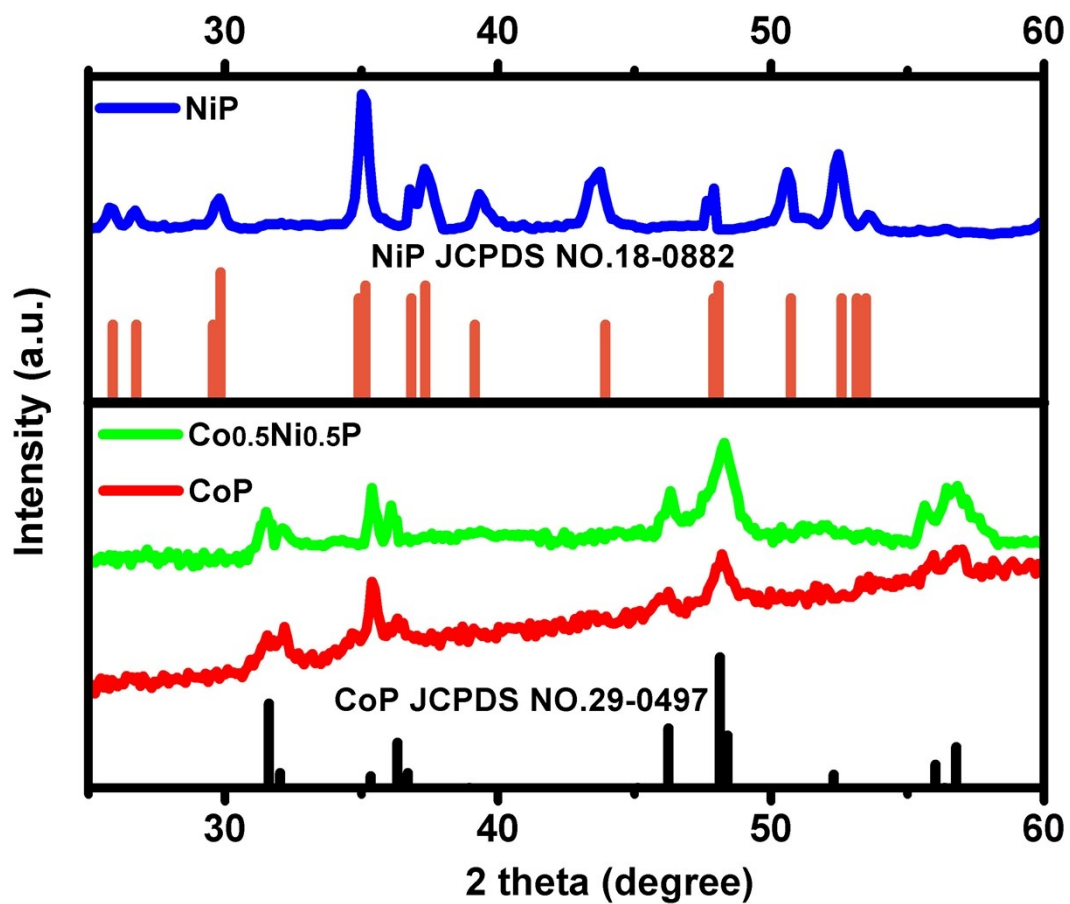

**Figure S5.** XRD spectra for NiP, CoP and Co<sub>0.5</sub>Ni<sub>0.5</sub>P scratched from CC.



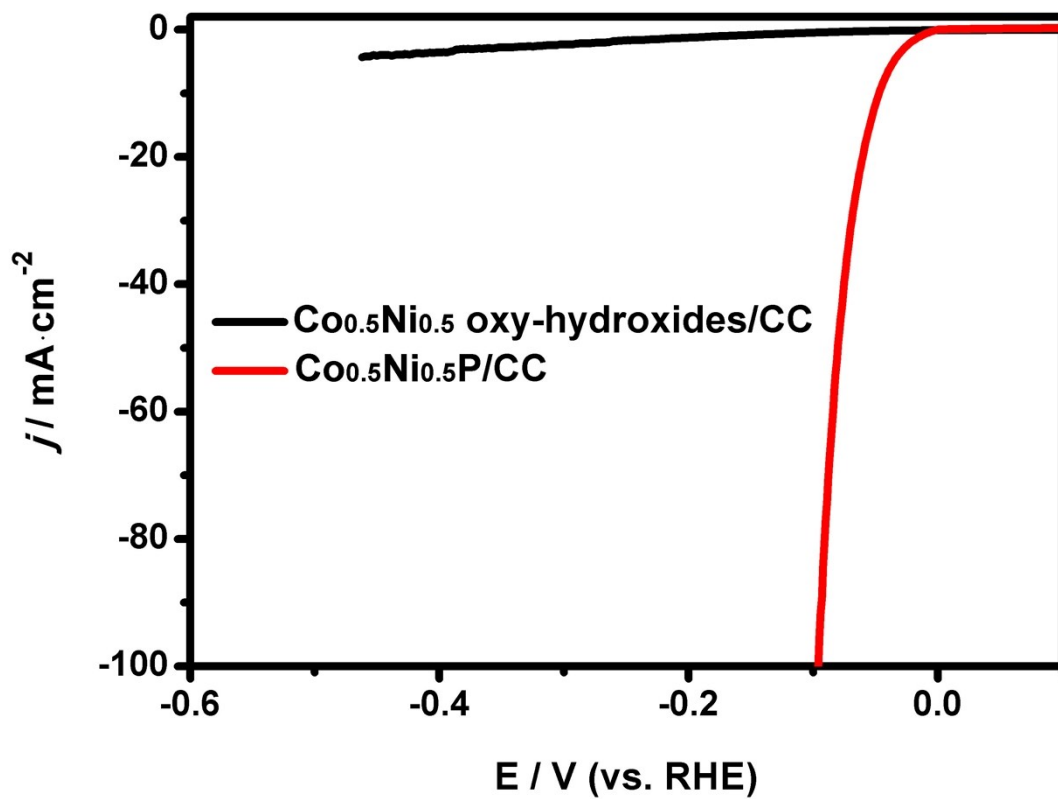

**Figure S6.** LSV curves for  $\text{Co}_{0.5}\text{Ni}_{0.5}$  oxy-hydroxides/CC and  $\text{Co}_{0.5}\text{Ni}_{0.5}\text{P/CC}$ .

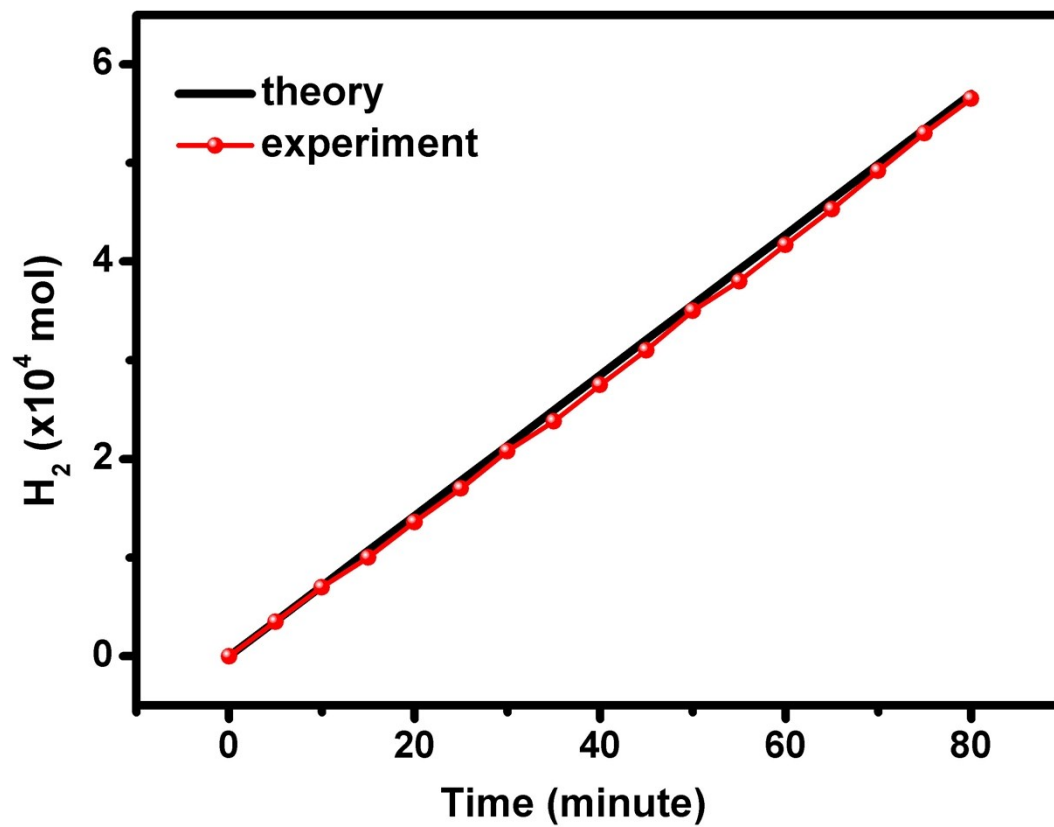

**Figure S7.** The amount of H<sub>2</sub> calculated by theory and measured from experiment versus time for Co<sub>0.5</sub>Ni<sub>0.5</sub>P/CC in 0.5 M H<sub>2</sub>SO<sub>4</sub>.

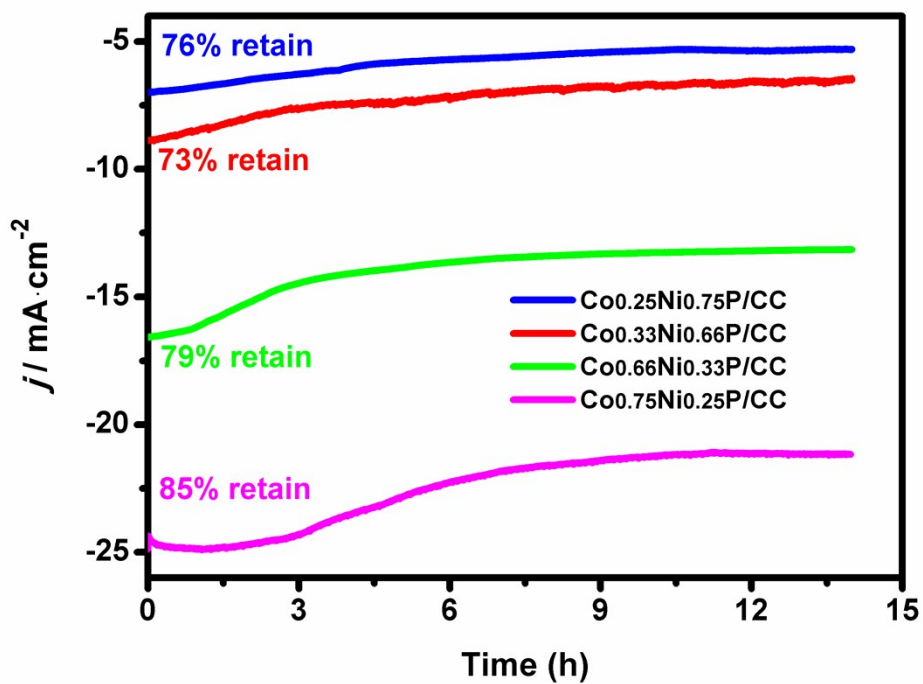

**Figure S8.** Time-dependent current density curves of  $\text{Co}_{0.25}\text{Ni}_{0.75}\text{P}/\text{CC}$ ,  $\text{Co}_{0.33}\text{Ni}_{0.66}\text{P}/\text{CC}$ ,  $\text{Co}_{0.66}\text{Ni}_{0.33}\text{P}/\text{CC}$  and  $\text{Co}_{0.75}\text{Ni}_{0.25}\text{P}/\text{CC}$  under a fixed overpotential of 90 mV for 14 h.

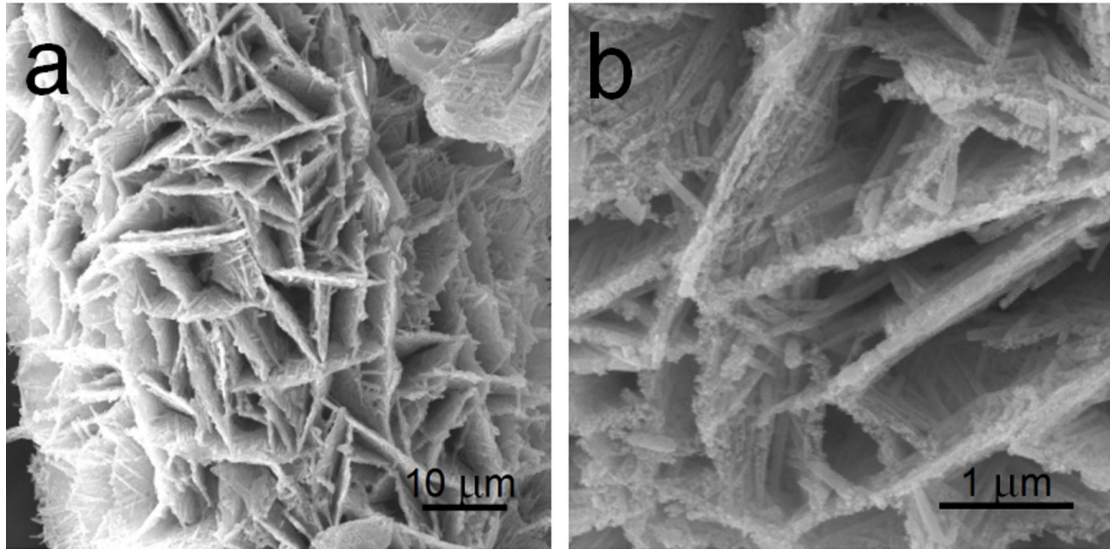

**Figure S9.** (a) and (b) SEM images of  $\text{Co}_{0.5}\text{Ni}_{0.5}\text{P}/\text{CC}$  after time-dependent current density test under different magnifications.

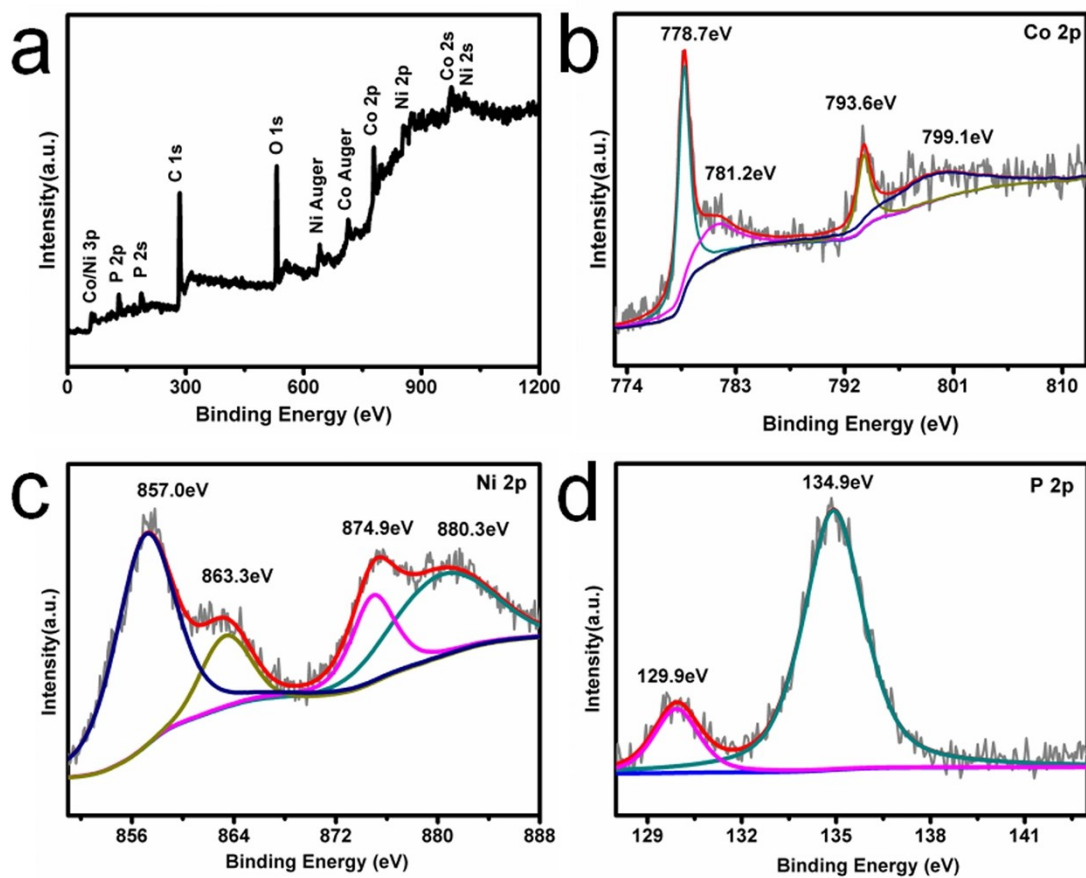

**Figure S10.** (a) XPS characterization of  $\text{Co}_{0.5}\text{Ni}_{0.5}\text{P}/\text{CC}$  and its corresponding (b) Co 2p, (c) Ni 2p and (d) P 2p spectra after time-dependent current density test.

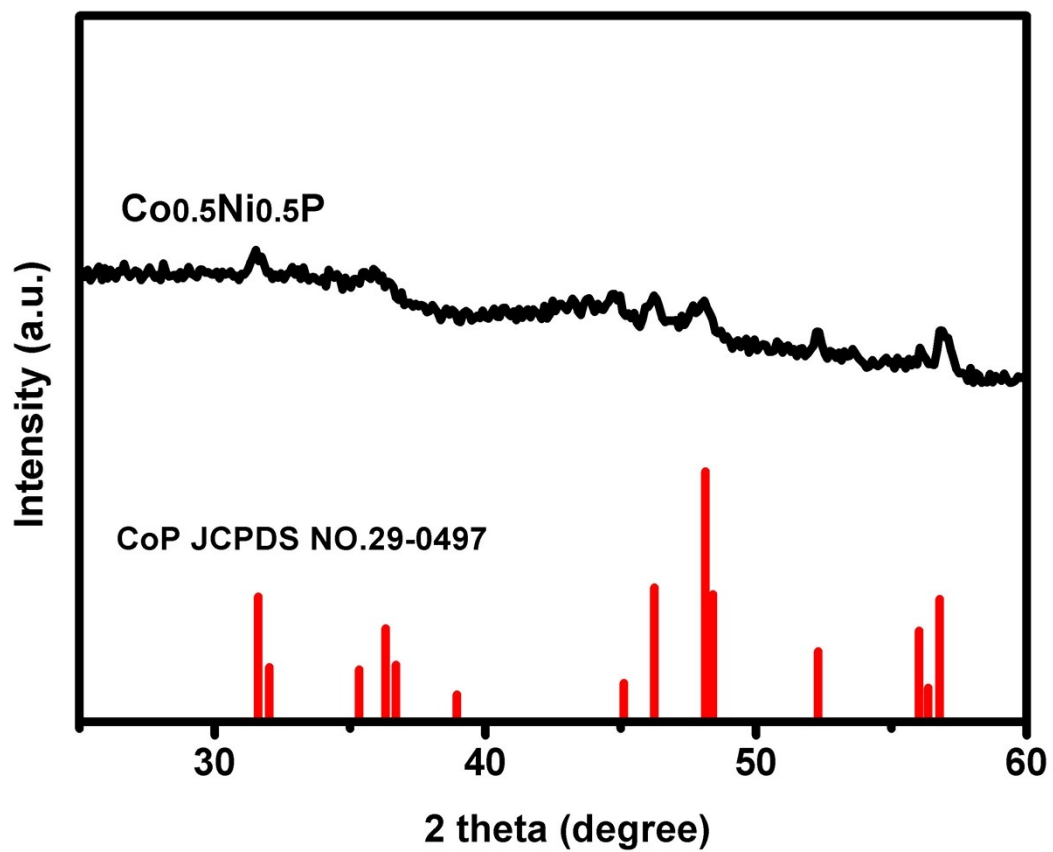

**Figure S11.** XRD spectrum of  $\text{Co}_{0.5}\text{Ni}_{0.5}\text{P}$  scratched from CC after time-dependent current density test.

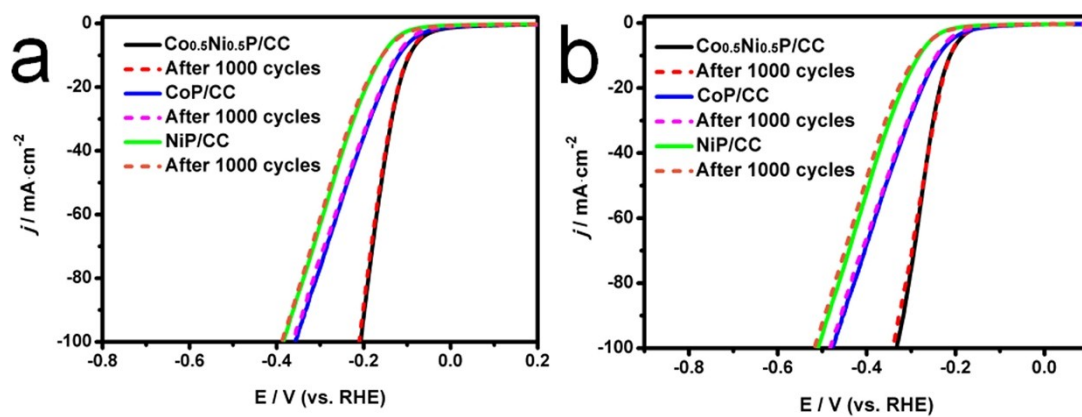

**Figure S12.** (a) Polarization curves of  $\text{Co}_{0.5}\text{Ni}_{0.5}\text{P/CC}$ ,  $\text{CoP/CC}$  and  $\text{NiP/CC}$  before and after 1000 CV cycles in (a) 0.5 M PBS and (b) 1.0 M KOH.

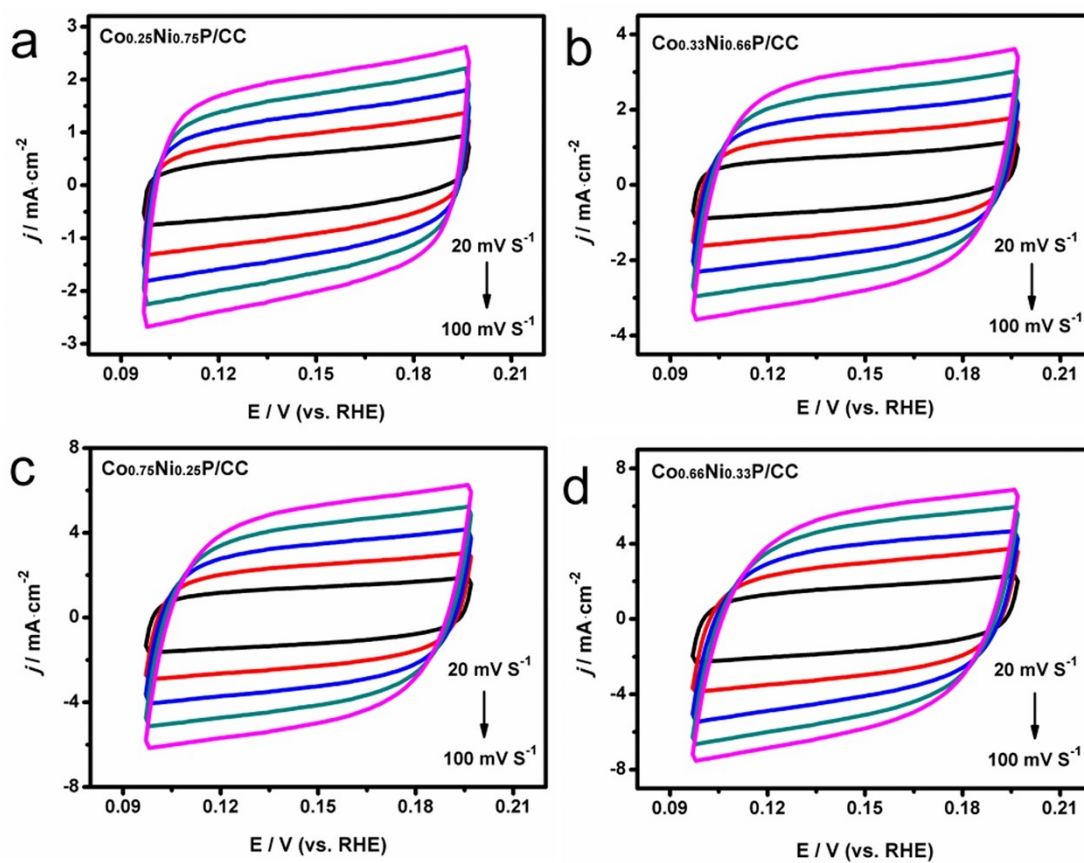

**Figure S13.** Cyclic voltammetry curves for (a)  $\text{Co}_{0.25}\text{Ni}_{0.75}\text{P/CC}$ , (b)  $\text{Co}_{0.33}\text{Ni}_{0.66}\text{P/CC}$ , (c)  $\text{Co}_{0.75}\text{Ni}_{0.25}\text{P/CC}$  and (d)  $\text{Co}_{0.66}\text{Ni}_{0.33}\text{P/CC}$  at different scan rates.



**Table S3.** Comparison of HER activity in acidic media for Co<sub>0.5</sub>Ni<sub>0.5</sub>P/CC with other existed non-noble-metal electrocatalysts.

| Catalyst                                         | Tafel slope<br>(mV dec <sup>-1</sup> ) | C <sub>dl</sub><br>(mF cm <sup>-2</sup> ) | Current density<br>(mA cm <sup>-2</sup> ) | Corresponding<br>Overpotential (mV) | Ref          |
|--------------------------------------------------|----------------------------------------|-------------------------------------------|-------------------------------------------|-------------------------------------|--------------|
| Co <sub>0.5</sub> Ni <sub>0.5</sub> P/CC         | 34.1                                   | 74.7                                      | 10                                        | 47                                  | This<br>work |
|                                                  |                                        |                                           | 100                                       | 96                                  |              |
| P-1T-MoS <sub>2</sub>                            | 43                                     | 63.1                                      | 10                                        | 153                                 | S1           |
| Co <sub>2</sub> P@NPG                            | 58                                     | 66.8                                      | 10                                        | 103                                 | S2           |
|                                                  |                                        |                                           | 20                                        | 129                                 |              |
| Cu <sub>7</sub> S <sub>4</sub> @MoS <sub>2</sub> | 48                                     |                                           | 10                                        | 133                                 | S3           |
| Co@BCN                                           | 63.7                                   | 83                                        | 10                                        | 96                                  | S4           |
| Se-enriched NiSe <sub>2</sub>                    | 32                                     | 10.93                                     | 10                                        | 117                                 | S5           |
| CoPS                                             | 56                                     | 99.6                                      | 10                                        | 48                                  | S6           |
| Mo <sub>2</sub> C@NPC/NPRGO                      | 30                                     | 17.9                                      | 10                                        | 34                                  | S7           |
| Co-C-N complex                                   | 55                                     | 400                                       | 10                                        | 138                                 | S8           |
|                                                  |                                        |                                           | 100                                       | 212                                 |              |
| CoSe <sub>2</sub> nanoparticle/CP                | 40                                     | 14.1                                      | 10                                        | 137                                 | S9           |
|                                                  |                                        |                                           | 100                                       | 181                                 |              |
| $\alpha$ -INS nanosheets                         | 40                                     |                                           | 10                                        | 105                                 | S10          |

## References

1. Y. Yin, J. Han, Y. Zhang, X. Zhang, P. Xu, Q. Yuan, L. Samad, X. Wang, Y. Wang, Z. Zhang, P. Zhang, X. Cao, B. Song and S. Jin, *J. Am. Chem. Soc.*, 2016, **138**, 7965-7972.
2. M. Zhuang, X. Ou, Y. Dou, L. Zhang, Q. Zhang, R. Wu, Y. Ding, M. Shao and Z. Luo, *Nano Lett.*, 2016, **16**, 4691-4698.
3. J. Xu, J. Cui, C. Guo, Z. Zhao, R. Jiang, S. Xu, Z. Zhuang, Y. Huang, L. Wang and Y. Li, *Angew. Chem. Int. Ed.*, 2016, **55**, 6502-6505.
4. H. Zhang, Z. Ma, J. Duan, H. Liu, G. Liu, T. Wang, K. Chang, M. Li, L. Shi, X. Meng, K. Wu and J. Ye, *ACS Nano*, 2016, **10**, 684-694.
5. F. M. Wang, Y. C. Li, Tofik A. Shifa, K. L. Liu, F. Wang, Z. X. Wang, P. Xu, Q. S. Wang and J. He, *Angew. Chem. Int. Ed.*, 2016, **55**, 6919-6924.
6. M. Caban-Acevedo, M. L. Stone, J. R. Schmidt, J. G. Thomas, Q. Ding, H. C. Chang, M. L. Tsai, J. H. He and S. Jin, *Nat. Mater.*, 2015, **14**, 1245-1251.
7. J. S. Li, Y. Wang, C. H. Liu, S. L. Li, Y. G. Wang, L. Z. Dong, Z. H. Dai, Y. F. Li and Y. Q. Lan, *Nat. Commun.*, 2016, **7**, 11204.
8. Z. L. Wang, X. F. Hao, Z. Jiang, X. P. Sun, D. Xu, J. Wang, H. X. Zhong, F. L. Meng and X. B. Zhang, *J. Am. Chem. Soc.*, 2015, **137**, 15070-15073.
9. D. Kong, H. Wang, Z. Lu and Y. Cui, *J. Am. Chem. Soc.*, 2014, **136**, 4897-4900.
10. X. Long, G. Li, Z. Wang, H. Zhu, T. Zhang, S. Xiao, W. Guo and S. Yang, *J. Am. Chem. Soc.*, 2015, **137**, 11900-11903.
